# Supplementary material for: RNA-Seq Reveals Differential Gene Expression in Staphylococcus aureus with Single-Nucleotide Resolution
Source: PubMed Central journal article supplement (PMC3792026; doi:10.1371/journal.pone.0076572), 2013-10-07
Supplement: pone.0076572.s001.pdf [file pone.0076572.s001.pdf]

Table S1

| <b>Genome position</b> | <b>Gene function</b>                         | <b>-gp67<sup>a</sup></b> | <b>+gp67<sup>b</sup></b> | <b>fold change<sup>c</sup></b> | <b>Locus (SAUOHSC)</b> |
|------------------------|----------------------------------------------|--------------------------|--------------------------|--------------------------------|------------------------|
| 9754                   |                                              | 118.291                  | 21.109                   | -1.723                         | 0007                   |
| 12785                  | trna synthesis                               | 338.936                  | 69.359                   | -1.587                         | ***serS<br>00074       |
| 78526                  | Fe transport                                 | 320.21                   | 51.904                   | -1.820                         | (sirA)                 |
| 99487                  |                                              | 751.303                  | 128.28                   | -1.768                         | sodM                   |
| 164124                 | Pyrimidine metabolism                        | 109.03                   | 17.41                    | -1.835                         | 00152<br>(187)         |
| 164748                 | indolpuyruvate decarboxylate                 | 139.571                  | 21.343                   | -1.878                         | 00153<br>(0188)        |
| 166582                 |                                              | 628.011                  | 93.171                   | -1.908                         | ptsG                   |
| 199582                 | isoprenyl cystein carboxyl methyltransferase | 382.718                  | 86.026                   | -1.493                         | 00182<br>(0220)        |
| 222778                 |                                              | 120.479                  | 20.511                   | -1.770                         | 0200                   |
| 271578                 |                                              | 431.454                  | 60.837                   | -1.959                         | 00253<br>(280)         |
| 297407                 |                                              | 285.614                  | 47.161                   | -1.801                         | 00282<br>(306)         |
| 341745                 |                                              | 148.352                  | 33.927                   | -1.475                         | 00328<br>(0346)        |
| 342463                 |                                              | 129.186                  | 24.217                   | -1.674                         | 00329<br>(347)         |
| 342787                 |                                              | 168.878                  | 31.855                   | -1.668                         | 00330<br>(348)         |
| 366132                 |                                              | 187.023                  | 41.175                   | -1.513                         | 00357<br>(0373)        |
| 402507                 |                                              | 44.8496                  | 7.0150                   | -1.855                         | 00399<br>(set15)       |
| 500137                 | NTP synthesis                                | 742.144                  | 89.702                   | -2.113                         | pdxS                   |
| 501028                 |                                              | 841.017                  | 116.51                   | -1.977                         | pdxT<br>(sav0520)      |
| 536141                 | 2-amino-3-oxobutane from acetyl coa          | 242.677                  | 39.254                   | -1.822                         | 00532<br>(550)         |
| 547607                 |                                              | 36.7493                  | 7.0773                   | -1.647                         | 00543.1                |
| 551104                 |                                              | 507.965                  | 83.640                   | -1.804                         | sdrD                   |
| 690241                 |                                              | 195.406                  | 23.006                   | -2.139                         | 0707                   |
| 691928                 | fructose permease                            | 316.081                  | 52.638                   | -1.793                         | 00708<br>(FruA)        |
| 722747                 |                                              | 1358.73                  | 86.276                   | -2.757                         | 00738<br>(SAV0727)     |
| 776118                 |                                              | 3048                     | 443.72                   | -1.927                         | 00794<br>(gapR)        |
| 801076                 | cold shock                                   | 5402.94                  | 322.97                   | -2.817                         | cspC                   |
| 804681                 |                                              | 207.55                   | 48.308                   | -1.458                         | 00827<br>(0824)        |
| 806086                 | 028697 acyl transferase                      | 352.807                  | 59.718                   | -1.776                         | 00830<br>(0826)        |
| 864859                 | pqi glucose 6-                               | 1297.41                  | 192.49                   | -1.908                         | ***pqi                 |

| phosphate (required) |                                                  |         |        |        |                    |
|----------------------|--------------------------------------------------|---------|--------|--------|--------------------|
| 890664               |                                                  | 999.459 | 146.08 | -1.923 | 00919<br>(0982)    |
| 909471               |                                                  | 411.913 | 67.071 | -1.815 | 00937<br>(1000)    |
| 940007               |                                                  | 185.156 | 31.379 | -1.775 | 00963<br>(1028)    |
| 947204               |                                                  | 111.982 | 25.901 | -1.464 | 00973<br>01021     |
| 990820               |                                                  | 853.732 | 147.18 | -1.758 | (1075)             |
| 993034               |                                                  | 579.556 | 64.304 | -2.199 | 01022<br>1077)     |
| 1004297              | mrna degradation and<br>processing (required)    | 966.567 | 134.26 | -1.974 | ***01036(<br>1089) |
| 1006241              |                                                  | 914.677 | 119.55 | -2.035 | 01037<br>(def)     |
| 1028809              |                                                  | 702.261 | 97.723 | -1.972 | 01064<br>(pycA)    |
| 1033752              | heme biosynthesis                                | 527.373 | 69.373 | -2.028 | ctaB<br>01067      |
| 1034688              |                                                  | 473.681 | 67.918 | -1.942 | (1118)             |
| 1051882              | trna synthetase                                  | 281.582 | 53.940 | -1.653 | ***pheS            |
| 1114346              | uracil permease                                  | 372.335 | 32.925 | -2.426 | pyrP               |
| 1115681              | pyrimidine<br>biosynthesis                       | 409.408 | 36.638 | -2.414 | pyrB<br>01168      |
| 1116580              | Pyrimidine<br>biosynthesis                       | 413.906 | 54.705 | -2.024 | (pyrC)             |
| 1117856              | Pyrimidine<br>biosynthesis                       | 430.515 | 85.961 | -1.611 | 01169<br>(pyrAA)   |
| 1122232              | Pyrimidine<br>biosynthesis                       | 461.721 | 87.618 | -1.662 | 01172<br>(pyrF)    |
| 1148092              |                                                  | 1135.87 | 185.42 | -1.813 | fapR<br>(1228)     |
| 1148669              | negative regulator of<br>fatty acid biosynthesis | 1206.48 | 210.10 | -1.748 | plsX<br>01252      |
| 1204422              |                                                  | 571.444 | 71.310 | -2.081 | (1275)             |
| 1242420              |                                                  | 1896.92 | 236.95 | -2.080 | 01285<br>(glnR)    |
| 1242807              | glutamine synthetase<br>(required)               | 2175.49 | 290.89 | -2.012 | ***01287<br>(glnA) |
| 1249421              |                                                  | 46.319  | 7.8498 | -1.775 | 1297<br>01309      |
| 1253698              |                                                  | 69.4637 | 10.140 | -1.924 | SAV1316            |
| 1268367              | amino acid<br>transporter                        | 597.115 | 92.257 | -1.868 | 1326<br>guaC       |
| 1272662              | NTP biosynthesis                                 | 304.507 | 41.202 | -2.000 | (sav1337)<br>01332 |
| 1273814              |                                                  | 458.992 | 76.713 | -1.789 | (1338)             |
| 1304208              | Oxidative stress                                 | 874.423 | 115.66 | -2.023 | msrA1              |
| 1426309              | tRNA synthetase                                  | 888.695 | 146.32 | -1.804 | asnS<br>01505      |
| 1458084              |                                                  | 643.869 | 125.43 | -1.636 | (1485)             |
| 1545327              | malonyl co-a fatty<br>acid biosynthesis          | 525.605 | 68.133 | -2.043 | ***01624<br>(accB) |

| (required) |                                               |         |        |        |                                          |
|------------|-----------------------------------------------|---------|--------|--------|------------------------------------------|
|            |                                               |         |        |        | 01759                                    |
| 1659667    | MreD                                          | 238.947 | 27.886 | -2.148 | (1648)                                   |
| 1798610    | riboflavin biosynthesis                       | 673.018 | 142.48 | -1.553 | ribH                                     |
| 1799087    | riboflavin biosynthesis                       | 602.566 | 124.79 | -1.575 | 01887<br>(ribA)                          |
| 1800279    | riboflavin biosynthesis                       | 647.036 | 107.00 | -1.800 | 01888<br>(ribB)                          |
| 1800918    | riboflavin biosynthesis                       | 654.379 | 115.33 | -1.736 | 01889<br>(ribD)                          |
| 1811161    | fructose 6 phosphate<br>aldolase              | 817.344 | 170.19 | -1.569 | 01901<br>(1781)                          |
| 1883879    |                                               | 1006.38 | 193.93 | -1.647 | 01979<br>(1847)                          |
| 1991203    | trna synthesitase                             | 953.649 | 201.14 | -1.556 | gatC                                     |
| 2103845    |                                               | 593.509 | 125.44 | -1.554 | rex 2273<br>(xcription<br>reg)<br>(2046) |
| 2152964    |                                               | 248.686 | 53.497 | -1.537 | 02319<br>(2084)                          |
| 2189428    |                                               | 261.971 | 54.169 | -1.576 | 02367<br>(2126)                          |
| 2256513    | Fe transport                                  | 477.757 | 96.856 | -1.596 | 02430<br>(htsA)                          |
| 2270735    | prostoglandin<br>dehydrogenase,<br>putative   | 177.138 | 38.462 | -1.527 | 02447<br>(2187)                          |
| 2272019    |                                               | 83.2365 | 16.023 | -1.648 | 02448<br>(2188)                          |
| 2348592    |                                               | 452.331 | 43.248 | -2.347 | 02554<br>(2284)                          |
| 2357498    | transcriptional<br>regulators: GntR<br>family | 1032.03 | 200.06 | -1.641 | sarR                                     |
| 2370059    | ribosomal protein E<br>(required)             | 394.45  | 42.534 | -2.227 | ***rpsE                                  |
| 2370857    |                                               | 200.504 | 20.811 | -2.265 | 2580.1                                   |
| 2438501    |                                               | 146.33  | 33.948 | -1.461 | 02652<br>(2370)                          |
| 2453507    |                                               | 181.402 | 38.899 | -1.540 | 02668<br>(2385)                          |
| 2454270    |                                               | 825.607 | 75.899 | -2.387 | sarZ                                     |
| 2454932    | protein<br>oxidoreductase                     | 533.963 | 113.27 | -1.551 | 02670<br>(2387)                          |
| 2477970    |                                               | 129.194 | 23.611 | -1.700 | 02694<br>(2409)                          |
| 2478588    |                                               | 86.8084 | 14.415 | -1.795 | 02695<br>(2410)                          |
| 2595325    |                                               | 94.3532 | 15.658 | -1.796 | 02816<br>(2513)                          |
| 2619737    |                                               | 92.976  | 15.579 | -1.786 | 02845<br>(5326)                          |
| 2620123    | glycolosis                                    | 98.7279 | 11.306 | -2.167 | 02846<br>ptsG                            |
| 2691654    | Na/SO4 symporter                              | 2120.95 | 361.13 | -1.770 | fda (2606)                               |

---

|         |                    |         |        |        |                 |
|---------|--------------------|---------|--------|--------|-----------------|
| 2801301 | Cold shock protein | 147.207 | 27.530 | -1.677 | 03030<br>(2694) |
| 2813019 | trna synthesis     | 6199.66 | 634.56 | -2.279 | cspB            |

---

<sup>a</sup> Reads per kilobase per million total reads

<sup>b</sup> Reads per kilobase per million total reads

<sup>c</sup> =  $e^{(+gp67/-gp67)}$
