# Supplementary material for: RNA-Seq Reveals Differential Gene Expression in Staphylococcus aureus with Single-Nucleotide Resolution
Source: PubMed Central journal article supplement (PMC3792026; doi:10.1371/journal.pone.0076572), 2013-10-07
Supplement: pone.0076572.s002.pdf [file pone.0076572.s002.pdf]

Table S2

| Genome position | Gene function                   | -gp67 <sup>a</sup> | +gp67 <sup>b</sup> | (fold change) <sup>c</sup> | locus |
|-----------------|---------------------------------|--------------------|--------------------|----------------------------|-------|
| 42680           | trna modification               | 183.00             | 1346.6             | 2.00                       | 39    |
| 110292          |                                 | 6.90               | 31.31              | 1.51                       | 106   |
|                 | polysaccharide                  |                    |                    |                            |       |
| 119491          | binding prot                    | 4.25               | 22.63              | 1.67                       | 114   |
| 121648          | nadp sugar binding              | 3.07               | 14.48              | 1.55                       | 117   |
| 125615          | cell wall biosynthesis          | 4.00               | 18.92              | 1.55                       | 120   |
| 130861          | cell wall biosynthesis          | 9.13               | 40.99              | 1.50                       | 125   |
| 133575          | cell wall biosynthesis          | 15.50              | 66.86              | 1.46                       | 128   |
| 140421          |                                 | 20.74              | 147.88             | 1.96                       | 134   |
| 141657          | ABC transporter                 | 37.82              | 159.99             | 1.44                       | 136   |
| 190529          |                                 | 33.36              | 208.49             | 1.83                       | 174   |
|                 | pfkB carbohydrate               |                    |                    |                            |       |
| 303758          | kinase                          | 2.41               | 16.74              | 1.94                       | 291   |
|                 | sialic acid                     |                    |                    |                            |       |
| 308682          | synthetase<br>MepB (MFS family) | 3.14               | 17.61              | 1.72                       | nanA  |
| 330822          | transporter                     | 34.68              | 152.72             | 1.48                       | 316   |
| 337879          |                                 | 4.60               | 24.69              | 1.68                       | 325   |
| 339970          |                                 | 7.63               | 38.28              | 1.61                       | 327   |
|                 | METHIONINE                      |                    |                    |                            |       |
| 349924          | BIOSYNTHESIS                    | 15.25              | 124.41             | 2.10                       | 340   |
| 365422          |                                 | 26.05              | 432.25             | 2.81                       | 356   |
| 366695          |                                 | 30.63              | 660.34             | 3.07                       | 358   |
| 564127          | PROLINE TRANSPORT               | 110.78             | 589.76             | 1.67                       | 556   |
|                 | acetyl co-a                     |                    |                    |                            |       |
| 567449          | transferase                     | 24.70              | 157.40             | 1.85                       | 558   |
| 568931          |                                 | 33.70              | 187.21             | 1.71                       | 560   |
| 610261          |                                 | 6.33               | 122.99             | 2.97                       | 619   |
| 614349          |                                 | 9.42               | 64.79              | 1.93                       | 624   |
| 614928          | translation                     | 17.25              | 86.63              | 1.61                       | mnhB2 |
| 619570          | translation                     | 15.67              | 95.92              | 1.81                       | mnhG2 |
|                 | glycosyl transferase ie         |                    |                    |                            |       |
| 628913          | WecG / TagA                     | 193.52             | 1213.98            | 1.84                       | 640   |
|                 | PHOSPHATE                       |                    |                    |                            |       |
| 657303          | TRANSPORTER                     | 562.03             | 4493.62            | 2.08                       | 669   |
|                 | PHOSPHATE                       |                    |                    |                            |       |
| 657936          | TRANSPORTER                     | 533.30             | 4734.35            | 2.18                       | 670   |
| 688883          |                                 | 226.10             | 1372.71            | 1.80                       | 704   |
| 716261          | sulfate transporter             | 123.67             | 1232.61            | 2.30                       | 731   |
| 718985          | Histidine biosynthesis          | 28.07              | 298.82             | 2.36                       | hisC  |
| 720394          |                                 | 160.51             | 912.64             | 1.74                       | 734   |
| 816025          |                                 | 30.42              | 884.46             | 3.37                       | 845   |
| 855576          |                                 | 298.98             | 1401.18            | 1.54                       | 892   |
| 889973          |                                 | 196.80             | 1643.28            | 2.12                       | 918   |
| 901688          | peptide transporter             | 4.00               | 17.65              | 1.49                       | 929   |
| 908437          |                                 | 5.42               | 25.51              | 1.55                       | 936   |

|         |                             |         |         |      |        |
|---------|-----------------------------|---------|---------|------|--------|
| 924132  |                             | 45.07   | 435.87  | 2.27 | 950    |
| 957785  | Cystein protease            | 28.61   | 132.72  | 1.53 | sspC   |
| 960953  | Aspartate amino transferase | 179.25  | 1737.92 | 2.27 | 989    |
| 1025648 |                             | 289.56  | 1585.69 | 1.70 | 1060   |
| 1025817 |                             | 288.33  | 1646.66 | 1.74 | 1061   |
| 1081622 | ARG BIOSYNTHESIS            | 7.08    | 70.45   | 2.30 | 1128   |
| 1082646 | Carbamate kinase            | 10.42   | 73.49   | 1.95 | arcC1  |
| 1083816 | anion permease              | 16.52   | 71.89   | 1.47 | 1130   |
| 1086146 | mallic acid transporter     | 165.48  | 891.37  | 1.68 | 1133   |
| 1087342 |                             | 126.91  | 850.30  | 1.90 | 1134   |
| 1162044 |                             | 43.21   | 256.51  | 1.78 | 1213   |
| 1186353 | zinc metallo protease       | 346.89  | 2482.23 | 1.97 | 1239   |
| 1187557 | trna synthetase             | 580.53  | 4381.59 | 2.02 | proS   |
| 1276192 |                             | 205.49  | 903.45  | 1.48 | 1336   |
| 1329326 | phosphate transporter       | 4.43    | 19.67   | 1.49 | 1386   |
| 1332693 |                             | 5.91    | 68.22   | 2.45 | A01332 |
| 1349110 |                             | 6.26    | 49.50   | 2.07 | 1410   |
| 1446046 |                             | 674.41  | 5336.69 | 2.07 | qpsA   |
| 1447061 |                             | 593.55  | 4578.22 | 2.04 | engA   |
| 1531152 | ArgE, Arg biosynthesis      | 72.93   | 438.67  | 1.79 | 1606   |
| 1596249 | ROS scavenging              | 73.59   | 361.01  | 1.59 | 1686   |
| 1635662 |                             | 35.81   | 346.15  | 2.27 | 1729   |
| 1635848 |                             | 33.56   | 337.70  | 2.31 | 1730   |
| 1692301 | Co-A biosynthesis           | 202.54  | 957.01  | 1.55 | 1795   |
| 1705673 |                             | 6.24    | 40.28   | 1.87 | 1804   |
| 1706497 |                             | 10.18   | 61.67   | 1.80 | 1805   |
| 1723310 |                             | 105.23  | 498.33  | 1.56 | 1817   |
| 1770560 |                             | 76.57   | 813.58  | 2.36 | 1864   |
| 1795367 |                             | 8.52    | 101.50  | 2.48 | 1880   |
| 1806781 |                             | 1009.79 | 8086.02 | 2.08 | 1895   |
| 1813963 |                             | 3.74    | 27.20   | 1.99 | 1905   |
| 1843315 | Serine protease             | 7.15    | 32.86   | 1.53 | spIE   |
| 1844133 | Serine protease             | 4.94    | 25.96   | 1.66 | spID   |
| 1845029 | Serine protease             | 4.11    | 44.18   | 2.37 | spIC   |
| 1845806 | Serine protease             | 3.09    | 29.60   | 2.26 | spIB   |
| 1846653 | Serine protease             | 2.76    | 19.67   | 1.96 | spIA   |
| 1889484 |                             | 125.92  | 915.47  | 1.98 | 1984   |
| 1889998 |                             | 8.95    | 45.97   | 1.64 | 1985   |
| 1978642 |                             | 18.50   | 179.01  | 2.27 | 2104   |
| 1979280 |                             | 221.48  | 1459.98 | 1.89 | 2106   |
| 1980013 |                             | 202.69  | 1335.89 | 1.89 | 2107   |
| 1982200 |                             | 16.68   | 295.79  | 2.88 | 2109   |
| 2031740 |                             | 71.08   | 472.18  | 1.89 | hIb    |
| 2202995 |                             | 938.94  | 14904.3 | 2.76 | 2381   |
| 2208189 | nadp binding prop           | 9.36    | 94.24   | 2.31 | 2387   |
| 2223263 |                             | 14.04   | 68.34   | 1.58 | 2402   |
| 2264436 |                             | 4.57    | 24.59   | 1.68 | 2437   |

|         |                                                       |        |         |      |        |
|---------|-------------------------------------------------------|--------|---------|------|--------|
| 2266096 |                                                       | 44.58  | 1452.99 | 3.48 | asp23  |
| 2266668 |                                                       | 14.04  | 489.08  | 3.55 | 2442   |
| 2266920 |                                                       | 19.98  | 513.40  | 3.25 | 2443   |
| 2267631 |                                                       | 3.47   | 72.07   | 3.03 | 2444   |
| 2279891 | Lactose metabolism                                    | 71.09  | 478.15  | 1.91 | lacR   |
| 2289533 |                                                       | 3.54   | 33.20   | 2.24 | 2466   |
| 2290322 |                                                       | 33.92  | 142.67  | 1.44 | 2467   |
| 2389508 |                                                       | 296.07 | 1437.99 | 1.58 | 2600   |
| 2391719 |                                                       | 41.85  | 188.11  | 1.50 | 2603   |
| 2420343 |                                                       | 52.11  | 235.33  | 1.51 | 2632   |
| 2425298 |                                                       | 5.91   | 68.22   | 2.45 | A02505 |
| 2503504 | glycerate kinase                                      | 85.32  | 512.81  | 1.79 | 2723   |
| 2504706 |                                                       | 201.33 | 1558.81 | 2.05 | 2724   |
| 2516693 | NADP binding                                          | 176.09 | 1067.86 | 1.80 | 2737   |
| 2517700 |                                                       | 52.52  | 797.26  | 2.72 | 2738   |
| 2519027 | drug transporter<br>amino acid                        | 392.01 | 3899.53 | 2.30 | 2740   |
| 2525681 | transporter<br>2-deoxy-D-gluconate<br>3-dehydrogenase | 36.93  | 372.04  | 2.31 | 2750   |
| 2549036 | NADP                                                  | 6.40   | 29.76   | 1.54 | 2772   |
| 2590644 |                                                       | 28.17  | 208.43  | 2.00 | 2812   |
| 2591199 |                                                       | 34.47  | 190.78  | 1.71 | 2814   |
| 2650766 | Squalene synthase                                     | 7.71   | 34.11   | 1.49 | crtN   |
| 2652286 | Squalene desaturase                                   | 5.28   | 30.00   | 1.74 | crtM   |
| 2653186 |                                                       | 3.32   | 20.07   | 1.80 | crtQ   |
| 2654319 | Phytoene<br>dehydrogenase                             | 2.91   | 16.62   | 1.74 | crtP   |
| 2659919 | acetyl transferase                                    | 18.93  | 138.41  | 1.99 | 2886   |
| 2735411 |                                                       | 46.69  | 299.58  | 1.86 | 2973   |
| 2775173 | Polysaccharide<br>polymerase (biofilm)                | 7.20   | 44.80   | 1.83 | icaD   |
| 2797472 |                                                       | 315.36 | 1869.31 | 1.78 | 3024   |
| 2798580 | Pyroglutamyl<br>peptidase                             | 30.13  | 177.12  | 1.77 | pcp    |
| 2800599 |                                                       | 9.03   | 54.80   | 1.80 | 3028   |
| 2816354 |                                                       | 210.35 | 1261.91 | 1.79 | mnmG   |
| 2819017 | translation                                           | 149.09 | 832.60  | 1.72 | mnmE   |
| 2820535 | translation                                           | 146.23 | 801.59  | 1.70 | rnpA   |

<sup>a</sup> Reads per kilobase per million total reads

<sup>b</sup> Reads per kilobase per million total reads

<sup>c</sup> =  $e^{(+gp67/-gp67)}$
