# Supplementary material for: RNA-Seq Reveals Differential Gene Expression in Staphylococcus aureus with Single-Nucleotide Resolution
Source: PubMed Central journal article supplement (PMC3792026; doi:10.1371/journal.pone.0076572), 2013-10-07
Supplement: pone.0076572.s003.pdf [file pone.0076572.s003.pdf]

Table S3

| <b>Genome position</b> | <b>Gene function</b>    | <b>NCTC 8325-4<sup>a</sup></b> | <b>RN 4220<sup>b</sup></b> | <b>fold change<sup>c</sup></b> | <b>p value<sup>d</sup></b> | <b>locus SAUOHSC</b> |
|------------------------|-------------------------|--------------------------------|----------------------------|--------------------------------|----------------------------|----------------------|
| 1142973-1143162        | translation             | 21944                          | 19572                      | -0.17                          | 0.871                      | rpmB                 |
| 1345916-1346117        | cold shock, putative    | 18639                          | 18982                      | 0.03                           | 0.979                      | cspA                 |
| 520793-521162          | translation             | 14647                          | 15704                      | 0.10                           | 0.925                      | rplL                 |
| 1151544-1151778        | fatty acid biosynthesis | 13995                          | 10009                      | -0.48                          | 0.624                      | acpP                 |
| 518656-519079          | translation             | 13826                          | 19981                      | 0.53                           | 0.622                      | rplK                 |
| 529959-530373          | translation             | 13589                          | 15650                      | 0.20                           | 0.849                      | rpsL                 |
| 1587819-1587996        | translation             | 13307                          | 8910                       | -0.58                          | 0.550                      | rpsU                 |
| 1201451-1201721        | translation             | 12420                          | 12584                      | 0.02                           | 0.985                      | rpsO                 |
| 530438-530909          | translation             | 11783                          | 12623                      | 0.10                           | 0.925                      | rpsG                 |
| 1600105-1600357        | translation             | 10753                          | 6378                       | -0.75                          | 0.439                      | rpsT                 |
| 1659192-1659501        | translation             | 10585                          | 10572                      | 0.00                           | 0.999                      | rplU                 |
| 1734576-1735179        | translation             | 10422                          | 10869                      | 0.06                           | 0.955                      | rpsD                 |
| 2182601-2182856        | translation             | 10254                          | 9372                       | -0.13                          | 0.895                      | rpmE2                |
| 2627401-2627620        | conserved hypothetical  | 9651                           | 9374                       | -0.04                          | 0.965                      | 2853                 |
| 1161540-1161891        | translation             | 9390                           | 8857                       | -0.08                          | 0.933                      | rplS                 |
| 2821009-2821147        | translation             | 9131                           | 6259                       | -0.54                          | 0.546                      | rpmH                 |
| 360629-360926          | translation             | 8764                           | 9270                       | 0.08                           | 0.935                      | rpsF                 |
| 2299326-2299725        | translation             | 8524                           | 8664                       | 0.02                           | 0.982                      | rpsI                 |
| 360946-361450          | translation             | 8500                           | 8593                       | 0.02                           | 0.988                      | 349                  |
| 1658570-1658855        | translation             | 8332                           | 8814                       | 0.08                           | 0.935                      | rpmA                 |
| 1658866-1659187        | conserved hypothetical  | 8329                           | 9101                       | 0.13                           | 0.897                      | 1756                 |
| 529607-529862          | translation             | 8262                           | 8630                       | 0.06                           | 0.949                      | 526                  |
| 1882163-1882508        | conserved hypothetical  | 7817                           | 3588                       | -1.12                          | 0.250                      | 1977                 |
| 2299738-2300176        | translation             | 7664                           | 8713                       | 0.19                           | 0.856                      | rplM                 |
| 2315349-2316183        | translation             | 7159                           | 8692                       | 0.28                           | 0.794                      | rplB                 |
| 1180819-1181588        | translation             | 6897                           | 9291                       | 0.43                           | 0.689                      | rpsB                 |
| 1682851-               | translation             | 6236                           | 9140                       | 0.55                           | 0.560                      | rpmI                 |

---

|          |                  |      |      |       |       |      |
|----------|------------------|------|------|-------|-------|------|
| 1683052  |                  |      |      |       |       |      |
| 2361997- | <b>conserved</b> |      |      |       |       |      |
| 2362801  | hypothetical     | 6209 | 3634 | -0.77 | 0.451 | 2571 |
| 1159734- |                  |      |      |       |       |      |
| 1160010  | translation      | 6076 | 5102 | -0.25 | 0.790 | rpsP |
| 2316215- |                  |      |      |       |       |      |
| 2317114  | translation      | 6054 | 6813 | 0.17  | 0.859 | rpiW |

<sup>a</sup> Reads per kilobase per million total reads

<sup>b</sup> Reads per kilobase per million total reads

<sup>c</sup> =  $e^{(+gp67/-gp67)}$

<sup>d</sup> Calculated by Cufflinks
