# Supplementary material for: RNA-Seq Reveals Differential Gene Expression in Staphylococcus aureus with Single-Nucleotide Resolution
Source: PubMed Central journal article supplement (PMC3792026; doi:10.1371/journal.pone.0076572), 2013-10-07
Supplement: pone.0076572.s004.pdf [file pone.0076572.s004.pdf]

Table S4

| <b>Genome position</b> | <b>Putative gene and func</b>                                  | <b>NCTC8325</b> | <b>RN4220</b> | <b>Amino acid change</b> | <b>Locus Tag</b> |
|------------------------|----------------------------------------------------------------|-----------------|---------------|--------------------------|------------------|
| 33961                  | SPOUT methyltransferase (rRNA large subunit methyltransferase) | G               | A             | E/K                      | SAOUHSC_00027    |
| 79054                  | Periplasmic binding protein                                    | C               | T             | G/R                      | SAOUHSC_00074    |
| 138265                 | Aldehyde dehydrogenase                                         | C               | T             | T/I                      | SAOUHSC_00132    |
| 142082                 | Conserved hypothetical protein                                 | C               | T             | P/L                      | SAOUHSC_00136    |
| 174867                 | HsdR family DNase                                              | G               | A             | W/*                      | SAOUHSC_00162    |
| 239805                 | Non-coding                                                     | C               | T             |                          |                  |
| 264985                 | Drug Transporter                                               | C               | T             | G/D                      | SAOUHSC_00246    |
| 281533                 | Conserved hypothetical protein                                 | G               | A             | W/*                      | SAOUHSC_00262    |
| 335921                 | Conserved hypothetical protein                                 | C               | T             | S/N                      | SAOUHSC_00322    |
| 388693                 | Super-antigen like protein                                     | C               | T             | P/S                      | SAOUHSC_00383    |
| 561510                 | Glucose 6-phosphate deaminase (putative)                       | C               | T             | A/V                      | SAOUHSC_00552    |
| 626575                 | ABC transporter (putative)                                     | C               | T             | S/N                      | SAOUHSC_00637    |
| 649126                 | Conserved hypothetical protein                                 | G               | T             | None                     | SAOUHSC_00661    |
| 795429                 | Clumping factor                                                | C               | T             | S/L                      | SAOUHSC_00812    |
| 920903                 | Non-coding                                                     | C               | T             |                          |                  |
| 937981                 | Conserved hypothetical protein                                 | C               | T             | None                     | SAOUHSC_00960    |
| 956938                 | Naphthoate synthase                                            | C               | T             | None                     | SAOUHSC_00985    |
| 975813                 | Quinol oxidase AA3                                             | C               | T             | A/T                      | SAOUHSC_01002    |
| 1063555                | UvrC                                                           | C               | T             | P/S                      | UvrC             |
| 1644195                | GTP pyrophosphokinase                                          | A               | T             | I/N                      | SAOUHSC_01742    |
| 1865100                | Non-coding                                                     | C               | T             |                          |                  |
| 1988769                | tRNA amidotransferase                                          | C               | T             | E/K                      | gatB             |
| 2012802                | Non-coding                                                     | C               | T             |                          |                  |
| 2096621                | AgrA                                                           | *               | A             | Frame Shift              | SAOUHSC_02665    |
| 2129629                | S1 RNA-binding domain-containing protein                       | C               | T             | D/N                      | SAOUHSC_02297    |

|         |                                            |   |   |     |               |
|---------|--------------------------------------------|---|---|-----|---------------|
| 2212727 | Truncated resolve                          | C | T | D/N | SAOUHSC_02392 |
| 2271169 | Conserved hypothetical protein             | C | T | G/D | SAOUHSC_02447 |
| 2318646 | Conserved hypothetical protein             | C | T | L/F | SAOUHSC_02515 |
| 2396232 | Imidazolonepropionase                      | G | A | T/I | SAOUHSC_02606 |
| 2408062 | Conserved hypothetical protein             | G | A | P/L | SAOUHSC_02619 |
| 2442934 | Non-coding                                 | C | T |     |               |
| 2445548 | PTS system sucrose-specific transporter    | C | T | A/T | SAOUHSC_02661 |
| 2447620 | Non-coding                                 | G | A |     |               |
| 2538208 | Non-coding                                 | G | A |     |               |
| 2570353 | Conserved hypothetical protein             | G | A | P/S | SAOUHSC_02798 |
| 2603659 | Conserved hypothetical protein             | G | A | P/S | SAOUHSC_02824 |
| 2631998 | HMG-CoA synthase                           | G | A | G/E | SAOUHSC_02860 |
| 2685055 | 2-dehydropantoate 2-reductase              | G | A | G/E | SAOUHSC_02920 |
| 2701403 | Non-coding                                 | G | A |     |               |
| 2813498 | Helix-turn-helix domain-containing protein | G | A | P/L | SAOUHSC_03046 |
