# Supplementary material for: RNA-Seq Reveals Differential Gene Expression in Staphylococcus aureus with Single-Nucleotide Resolution
Source: PubMed Central journal article supplement (PMC3792026; doi:10.1371/journal.pone.0076572), 2013-10-07
Supplement: pone.0076572.s005.pdf [file pone.0076572.s005.pdf]

**Table S5a**

| <b>Genome position</b> | <b>Gene</b>                               | <b>NCTC 8325-4<sup>a</sup></b> | <b>RN 4220<sup>b</sup></b> | <b>fold change<sup>c</sup></b> | <b>p value<sup>d</sup></b> | <b>locus (SAUOHSC)</b> |
|------------------------|-------------------------------------------|--------------------------------|----------------------------|--------------------------------|----------------------------|------------------------|
| 2093157-2093673        | RNAIII                                    | 1304.97                        | 41.2993                    | -4.981                         | 0.0000                     | RNAIII                 |
| 2244538-2244724        | conserved hypothetical                    | 431.246                        | 41.6507                    | -3.372                         | 0.0002                     | 02416                  |
| 2290322-2291027        | putative alpha-acetolactate decarboxylase | 334.645                        | 39.6627                    | -3.076                         | 0.0006                     | 02467                  |
| 2291063-2292728        | AlsS: Stationary phase metabolism         | 323.345                        | 41.4389                    | -2.964                         | 0.0010                     | 02468                  |

**Table S5b:** Genes significantly upregulated in RN4220 relative to NCTC8325-4 by RNA-seq (listed by fold change)

| <b>Genome position</b> | <b>Gene</b>                    | <b>NCTC 8325-4<sup>a</sup></b> | <b>RN 4220<sup>b</sup></b> | <b>fold change<sup>c</sup></b> | <b>p value<sup>d</sup></b> | <b>locus SAUOHSC</b> |
|------------------------|--------------------------------|--------------------------------|----------------------------|--------------------------------|----------------------------|----------------------|
| 551104-555154          | sdrD                           | 19.6431                        | 593.981                    | 4.9183                         | 0.000                      | sdrD                 |
| 141657-142398          | putative nitrate transporter   | 1.51517                        | 44.2299                    | 4.8674                         | 0.000                      | 00136                |
| 424709-425735          | ABC transporter                | 3.37815                        | 75.2257                    | 4.4769                         | 0.000                      | metN1                |
| 425738-426398          | putative ABC transporter       | 2.33495                        | 53.3995                    | 4.5153                         | 0.001                      | 00424                |
| 896023-898037          | putative ABC transporter       | 3.87502                        | 69.9488                    | 4.1740                         | 0.001                      | 00926                |
| 894010-896007          | oppB putative                  | 3.58305                        | 62.2538                    | 4.1189                         | 0.001                      | 00924                |
| 140803-141316          | conserved hypothetical         | 23.6997                        | 321.892                    | 3.7636                         | 0.001                      | 00135                |
| 898055-899711          | ABC transporter OppA, putative | 8.17295                        | 103.689                    | 3.6652                         | 0.002                      | 00927                |
| 1263418-1264699        | dhoM (thrC operon)             | 11.2979                        | 117.789                    | 3.3820                         | 0.005                      | 01320                |
| 624571-627080          | putative ABC transporter       | 510.859                        | 6489.18                    | 3.6670                         | 0.008                      | 00636                |
| 2722967-2725601        | clfB                           | 130.692                        | 1781.62                    | 3.7689                         | 0.009                      | clfB                 |
| 1338096-1339086        | asd (dap operon)               | 6.33142                        | 68.3555                    | 3.4324                         | 0.009                      | 01395                |
| 547607-550738          | hypothetical                   | 22.2434                        | 233.87                     | 3.3942                         | 0.010                      | sdrC                 |
| 142411-144144          | srpL ABC transporter, putative | 3.42187                        | 36.4878                    | 3.4145                         | 0.015                      | 00137                |
| 1339087-1340694        | amino acid metabolism          | 9.4465                         | 84.6008                    | 3.1628                         | 0.018                      | dapA                 |

|                     |                                          |         |         |        |       |       |
|---------------------|------------------------------------------|---------|---------|--------|-------|-------|
| 426434-<br>427277   | ABC transporter,<br>putative             | 12.8884 | 105.589 | 3.0343 | 0.021 | 00426 |
| 1073723-<br>1074074 | conserved<br>hypothetical                | 44.3692 | 332.065 | 2.9038 | 0.023 | 01115 |
| 2484751-<br>2485438 | hypothetical                             | 238.492 | 1921.97 | 3.0105 | 0.024 | gpmA  |
| 73428-<br>74979     | cell wall                                | 643.985 | 7448.74 | 3.5319 | 0.027 | spa   |
|                     | conserved<br>hypothetical, putative      |         |         |        |       |       |
| 2794365-<br>2795214 | SAM adeno<br>transferase                 | 2.12122 | 20.5846 | 3.2786 | 0.027 | 03021 |
| 813119-<br>814833   | MetN: Methionine<br>transporter          | 16.4666 | 123.011 | 2.9011 | 0.030 | 00843 |
| 569401-<br>569569   | conserved<br>hypothetical                | 458.178 | 3001.92 | 2.7119 | 0.031 | 00561 |
| 814850-<br>815672   | conserved<br>hypothetical                | 31.9421 | 208.052 | 2.7034 | 0.032 | 00844 |
| 1736777-<br>1739529 | conserved<br>hypothetical                | 13.7354 | 96.2486 | 2.8088 | 0.032 | 01832 |
| 144156-<br>145188   | conserved<br>hypothetical                | 6.04009 | 48.4601 | 3.0041 | 0.032 | 00139 |
| 276307-<br>280009   | conserved<br>hypothetical                | 15.999  | 98.0291 | 2.6152 | 0.038 | 00258 |
| 2115681-<br>2116686 | ilvC, valine /<br>isoleucine metabolism  | 2.37121 | 19.9625 | 3.0736 | 0.040 | ilvC  |
| 2581382-<br>2584524 | hypothetical                             | 11.1302 | 63.99   | 2.5233 | 0.048 | fnbA  |
| 2788278-<br>2789097 | tRNA synthetase                          | 1.15579 | 9.79585 | 3.0832 | 0.049 | hisZ  |
| 938929-<br>939460   | comK, competence<br>transcription factor | 3.63073 | 29.5025 | 3.0225 | 0.049 | 00961 |
| 1264704-<br>1265766 | thrC, threonine<br>synthetase            | 26.608  | 152.859 | 2.5222 | 0.049 | 01321 |

<sup>a</sup> Reads per kilobase per million total reads

<sup>b</sup> Reads per kilobase per million total reads

<sup>c</sup> =  $e^{(+gp67/-gp67)}$

<sup>d</sup> Calculated by Cufflinks
