# Supplementary material for: RNA-Seq Reveals Differential Gene Expression in Staphylococcus aureus with Single-Nucleotide Resolution
Source: PubMed Central journal article supplement (PMC3792026; doi:10.1371/journal.pone.0076572), 2013-10-07
Supplement: pone.0076572.s006.pdf [file pone.0076572.s006.pdf]

Table S6

| Genome position | Putative genes and functions                                     | 8325 | 8325-4 /RN4220 | Amino acid change | Locus tag  |
|-----------------|------------------------------------------------------------------|------|----------------|-------------------|------------|
| 22181           | ---                                                              | C    | A              | ---               | intergenic |
| 47652           | ---                                                              | T    | .              | ---               | intergenic |
| 110019          | phosphonate ABC transporter, substrate-binding protein, putative | C    | A              | 16 V-F            | 00105      |
| 392716          | ---                                                              | G    | A              | ---               | intergenic |
| 412762          | ---                                                              | .    | T              | ---               | intergenic |
| 412765          | ---                                                              | C    | G              | ---               | intergenic |
| 590402          | Conserved hypothetical protein                                   | G    | .              | Frameshift        | 00591      |
| 653801          | ---                                                              | C    | T              | ---               | intergenic |
| 751285          | SecA                                                             | A    | T              | 449 E-V           | 00769      |
| 827849          | TauE, sulfite exporter                                           | A    | T              | 164 T-S           | 00860      |
| 926213          | hypothetical protein                                             | G    | C              | 235 P-A           | 00952      |
| 939304          | ComK                                                             | C    | T              | 53 E-K            | 00961      |
| 947899          | hypothetical protein                                             | C    | .              | 232 P-X           | 00973      |
| 1016979         | putative ABC transporter                                         | G    | A              | 220 E-K           | 01048      |
| 1020577         | Conserved Hypothetical protein                                   | G    | T              | 286 S-*           | 01053      |
| 1042000         | ribosomal protein L32                                            | T    | .              | 34 G-X            | 01078      |
| 1123048         | PyrE pyrimidine biosynthesis                                     | G    | A              | 42 G-S            | 01         |
| 1160513         | rimM                                                             | G    | A              | 106 A-T           | rimM       |
| 1160531         | rimM                                                             | A    | G              | 112 K-E           | rimM       |
| 1180886         | rpsB 30S ribosomal protein S2                                    | G    | .              | 10 V-X            | 01232      |
| 1283784         | hypothetical protein                                             | C    | .              | 943 D-X           | 01342      |
| 1358230         | Kdg alpha-ketoglutarate decarboxylase                            | C    | T              | 590 D-N           | 01418      |
| 1562913         | rhomboid family protein                                          | A    | T              | 337 *-K           | 01649      |
| 1636255         | hypothetical protein                                             | T    | .              | 100 Q-X           | 01732      |
| 1683491         | infC translation initiation factor IF-3                          | T    | C              | 40 K-E            | 01786      |
| 1733515         | EzrA                                                             | G    | T              | 73 T-N            | 01827      |
| 2087725         | GroEL                                                            | A    | T              | 218 F-I           | Transcript |
| 2106539         | ABC transporter, putative                                        | A    | T              | 602 L-F           | Transcript |
| 2166163         | UDP-N-acetylglucosamine 1-carboxyvinyltransferase                | G    | C              | 124 T-R           | 02337      |
| 2221850         | hypothetical protein                                             | C    | A              | 244 S-Y           | 02401      |
| 2244467         | ---                                                              | A    | G              | ---               | intergenic |
| 2244495         | ---                                                              | G    | A              | ---               | intergenic |
| 2244932         | hypothetical protein                                             | C    | .              | 296 *-X           | 02417      |
| 2244933         | hypothetical protein                                             | T    | .              | 296 *-X           | 02417      |

|         |                                                                    |   |   |          |                                 |
|---------|--------------------------------------------------------------------|---|---|----------|---------------------------------|
| 2318272 | ---                                                                | G | A | ---      | intergenic                      |
| 2318274 | ---                                                                | G | T | ---      | intergenic                      |
| 2318290 | ---                                                                | C | A | ---      | intergenic 02512 <--<br>> 02515 |
| 2349916 | ---                                                                | G | T | ---      | intergenic                      |
| 2420618 | hypothetical protein;-<br>hypothetical protein                     | . | T | ---      | 02632;02633                     |
| 2447620 | ---                                                                | G | A | ---      | intergenic                      |
| 2592012 | hypothetical protein;-<br>hypothetical protein                     | A | . | ---      | 02813;02814                     |
| 2689048 | hypothetical protein                                               | G | T | 353 V-L  | 02923                           |
| 2762204 | hypothetical protein                                               | T | C | 1514 N-S | 02990                           |
| 2782820 | imidazole glycerol<br>phosphate synthase<br>subunit hisF, putative | C | . | 247 G-X  | 03008                           |
| 649126  | hypothetical protein                                               | G | T | 202 G-G  | 00661                           |
| 841103  | hypothetical protein                                               | G | T | 39 G-G   | 00877                           |
| 841139  | hypothetical protein                                               | G | T | 51 G-G   | 00877                           |
| 1653482 | tgt queuine tRNA-<br>ribosyltransferase                            | G | A | 91 I-I   | 01748                           |
| 2166183 | UDP-N-<br>acetylglucosamine 1-<br>carboxyvinyltransferase          | C | A | 117 G-G  | 02337                           |
| 2383630 | hypothetical protein                                               | G | T | 68 G-G   | 02591                           |
| 2383660 | hypothetical protein                                               | G | T | 78 G-G   | 02591                           |
| 2446246 | PTS system sucrose-<br>specific IIBC component                     | C | T | 42 E-E   | 02662                           |
| 2446641 | hypothetical protein                                               | T | A | 95 I-I   | 02663                           |
| 2678563 | hypothetical protein                                               | T | C | 107 P-P  | 02911                           |
